# Supplementary material for: MAPK Signaling Determines Anxiety in the Juvenile Mouse Brain but Depression-Like Behavior in Adults
Source: PLOS journal article supplement (doi:10.1371/journal.pone.0035035), 2012-04-18

**Figure S2. Molecular characterization of Camklla-Cre and Braf<sup>cko</sup> mice**

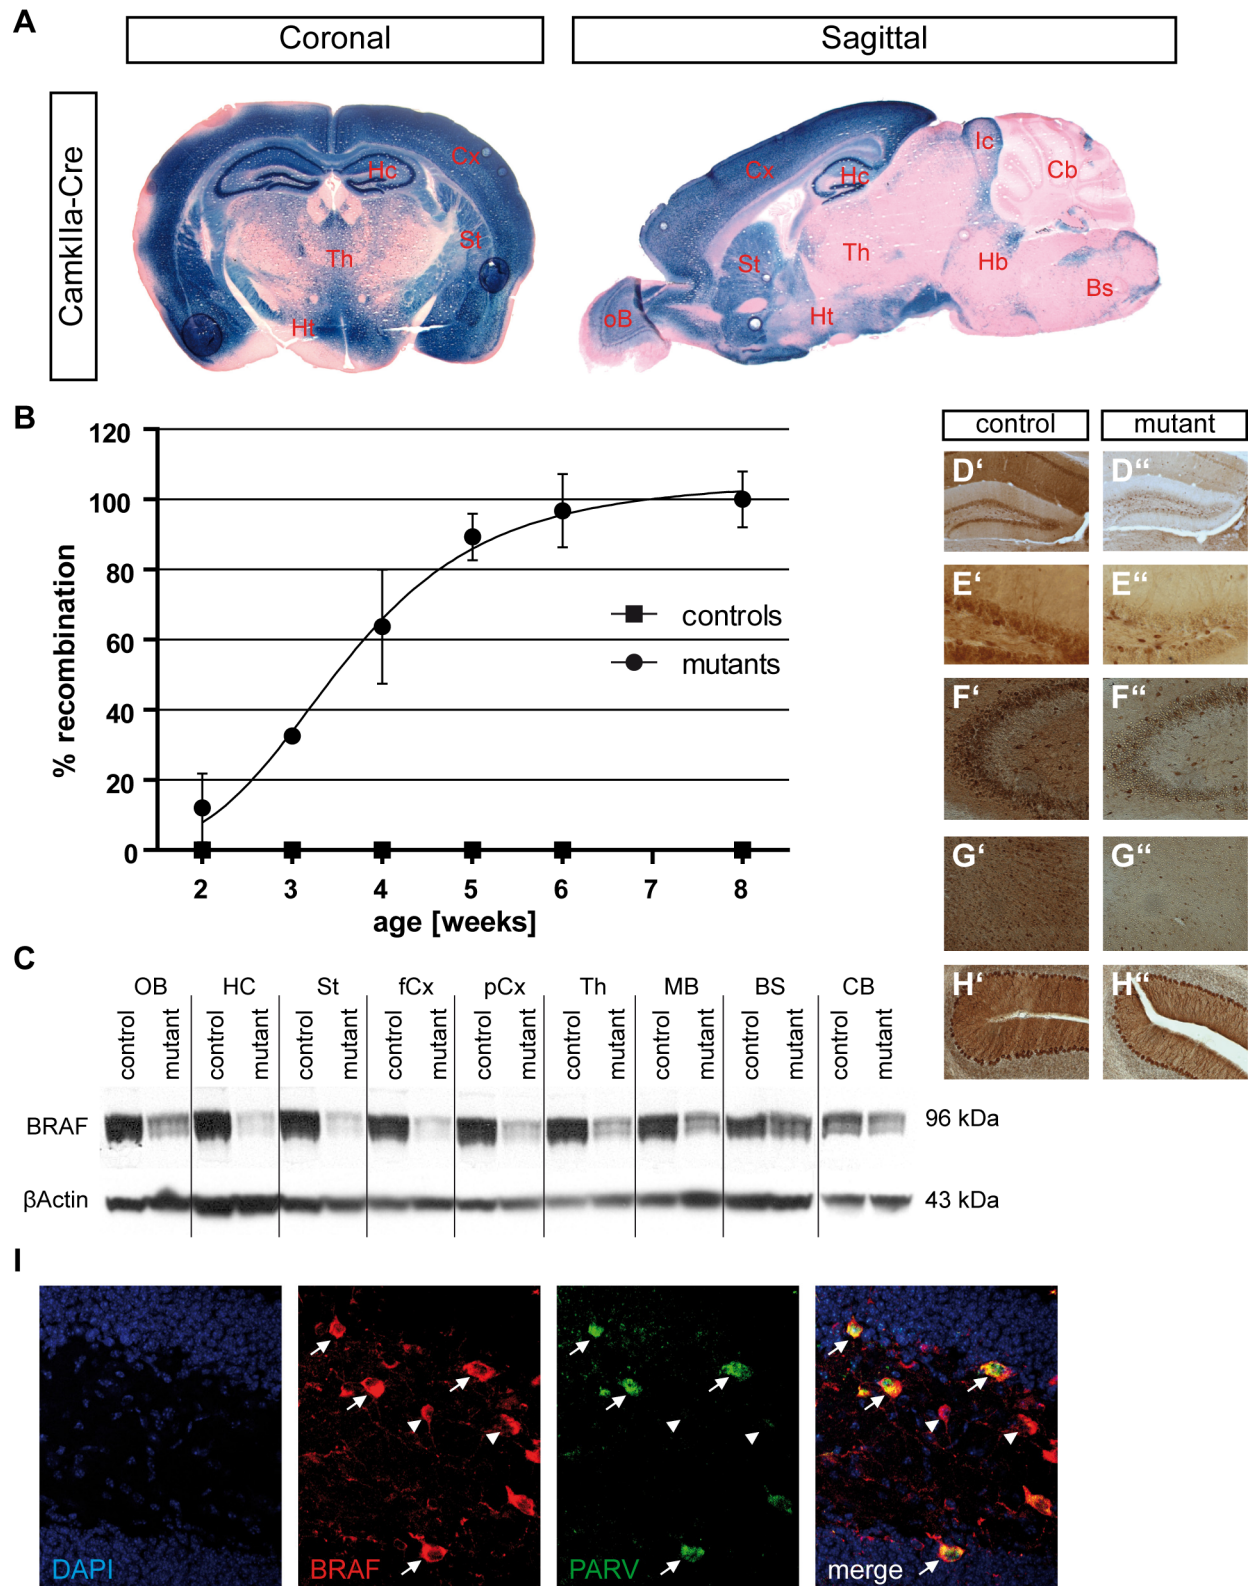

Supplement: S2 (10.1371/journal.pone.0035035.s002) [file journal.pone.0035035.s002]
