# Supplementary material for: MAPK Signaling Determines Anxiety in the Juvenile Mouse Brain but Depression-Like Behavior in Adults
Source: PLOS journal article supplement (doi:10.1371/journal.pone.0035035), 2012-04-18

**Figure S3. Behavioral analysis of Camk1la-Cre mice.**

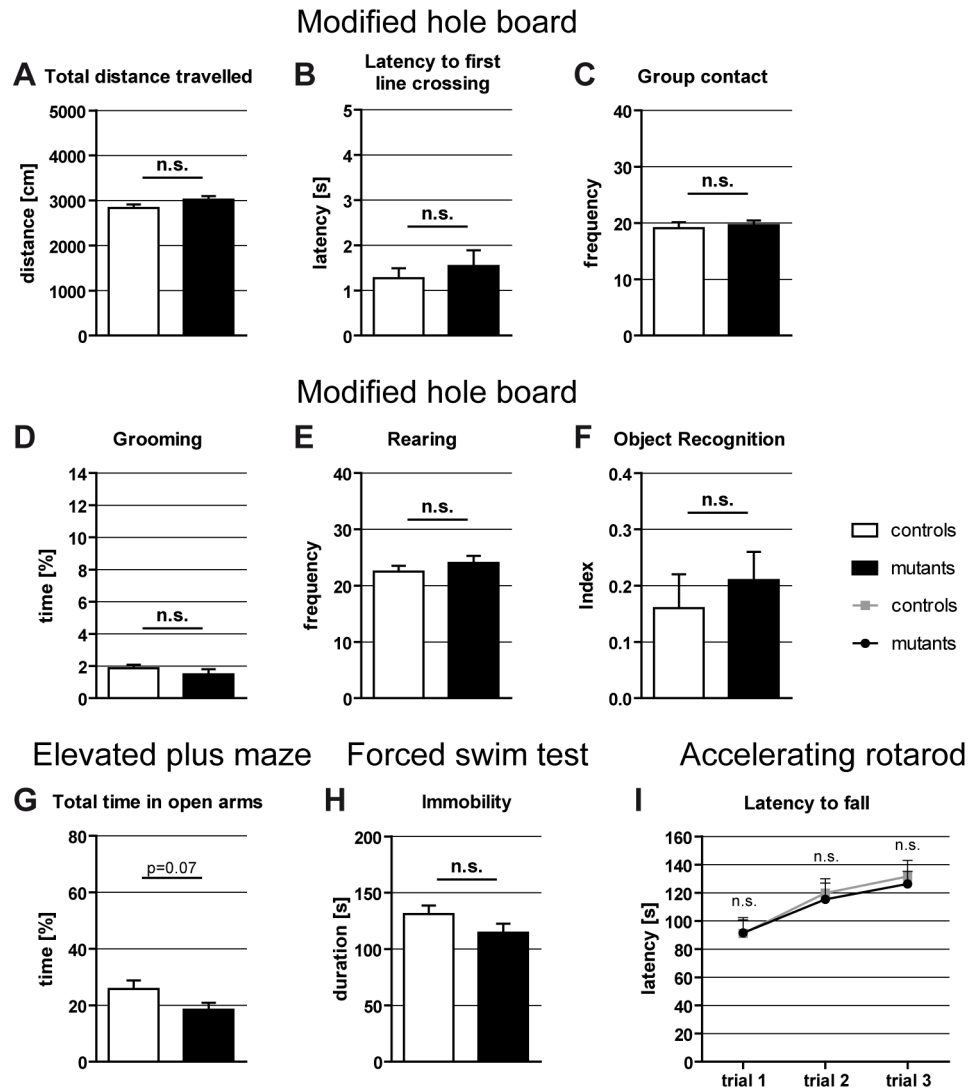

Supplement: S3 (10.1371/journal.pone.0035035.s003) [file redirect.do]
