# Supplementary material for: MAPK Signaling Determines Anxiety in the Juvenile Mouse Brain but Depression-Like Behavior in Adults
Source: PLOS journal article supplement (doi:10.1371/journal.pone.0035035), 2012-04-18

**Figure S4. GABA<sub>A</sub> receptor-mediated inhibition is not enhanced in hippocampi from Brat<sup>cko</sup> mice.**

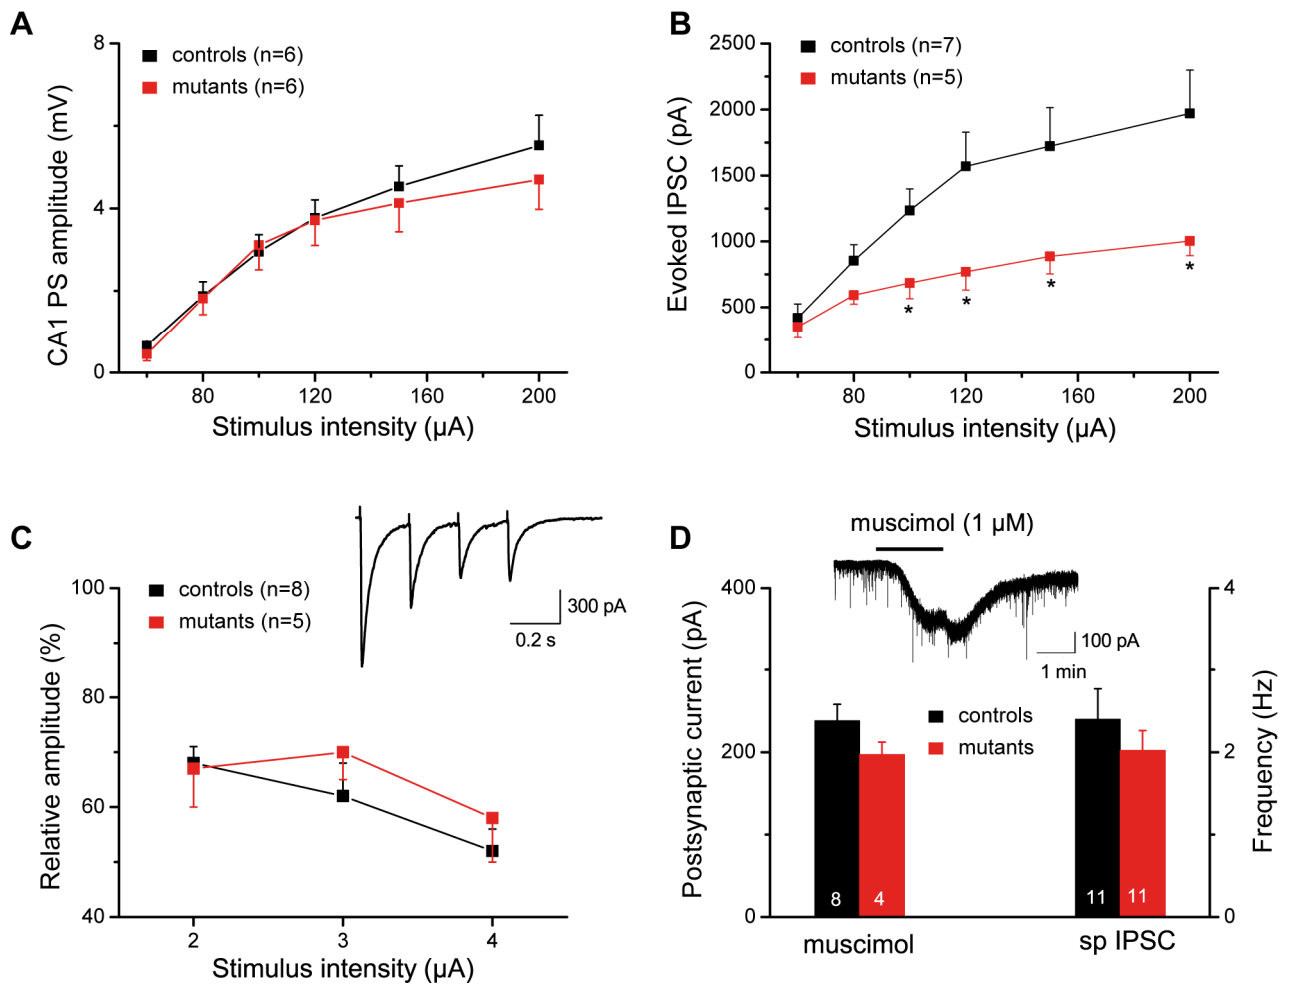

Supplement: S4 (10.1371/journal.pone.0035035.s004) [file redirect.do]
