# Supplementary material for: MAPK Signaling Determines Anxiety in the Juvenile Mouse Brain but Depression-Like Behavior in Adults
Source: PLOS journal article supplement (doi:10.1371/journal.pone.0035035), 2012-04-18
Supplement: S8 (10.1371/journal.pone.0035035.s008) [file journal.pone.0035035.s008]

## Supporting Method S1

### Southern blot analysis

Genomic DNA was isolated from tissue samples with phenol/chloroform extraction, digested with HindIII, separated by gel electrophoresis, and transferred to Hybond N+ membranes. A 440 bp genomic fragment, ranging from intron 12 to 13 of the *Braf* gene, was amplified using PCR (forward primer: 5'-AGG CAC AGG AAC TTG GGA GT-3', reverse primer: 5'-TCC GAG GAT GAG GAA GAA GA-3') and used as P<sup>32</sup>-labeled probe to detect the *Braf*<sup>fl<sup>ox</sup></sup> and the recombined alleles. The membranes were next exposed to Kodak X-ray films and signals were quantified with ImageJ.
